# Supplementary material
Source: publisher figshare collection journal article supplement (https://gsapubs.figshare.com/articles/dataset/_/14582757)
Supplement: Supplementary file 1 [file 1]

## Sheet: Sheet1
Table DR2
Nulls
Station	Station Lat (°)	Station Lon (°)	Event Lat (°)	Event Lon (°)	Depth (km)	Backazimuth (°)	Distance (°)	Phase	Quality
EP21	58.212	-157.377	-2	98.6	9	280.9	99.1	SKS	fair
KS03	57.6133	-152.235	-2	98.6	9	285.3	101.9	SKS	fair
KT10	57.295	-153.66	-2	98.6	9	284	101.2	SKS	fair
KD01	57.6401	-152.438	-8.2	116.5	14	266.4	97.5	SKS	fair
KD02	57.8618	-152.657	-8.2	116.5	14	266.3	97.4	SKS	fair
LA33	54.1528	-158.114	-8.2	116.5	14	261.4	94	SKS	fair
WD48	56.6274	-151.731	-8.2	116.5	14	266.9	97.8	SKS	fair
WD54	56.3314	-149.067	-8.2	116.5	14	269.1	99.3	SKS	fair
WD57	54.7364	-154.434	-8.2	116.5	14	264.5	96.2	SKS	fair
WD66	53.3145	-159.618	-8.2	116.5	14	260.2	93	SKS	fair
WD68	52.9176	-160.081	-8.2	116.5	14	259.8	92.6	SKS	fair
KD01	57.6401	-152.438	-8.3	116.4	34	266.5	97.6	SKS	fair
KD02	57.8618	-152.657	-8.3	116.4	34	266.3	97.5	SKS	fair
KD04	57.3042	-152.85	-8.3	116.4	34	266.1	97.3	SKS	fair
LD41	54.5219	-153.407	-8.3	116.4	34	265.3	96.8	SKS	fair
KD02	57.8618	-152.657	-11	-70.8	630	102.8	95	SKS	fair
KD04	57.3042	-152.85	-11	-70.8	630	102.6	95	SKS	fair
KT06	57.6517	-154.004	-11	-70.8	630	101.7	95.7	SKS	fair
KT08	57.443	-153.815	-11	-70.8	630	101.8	95.5	SKS	fair
LD41	54.5219	-153.407	-11	-70.8	630	102.4	94.7	SKS	fair
WD50	55.4495	-152.392	-11	-70.8	630	103.2	94.4	SKS	fair
WD57	54.7364	-154.434	-11	-70.8	630	101.6	95.3	SKS	fair
WD58	53.9062	-155.035	-11	-70.8	630	101.2	95.5	SKS	fair
WD68	52.9176	-160.081	-11	-70.8	630	97.3	98.3	SKS	fair
WS75	54.1796	-160.257	-11	-70.8	630	97	98.6	SKS	fair
KT08	57.443	-153.815	-10.8	124.2	14	257.5	94.8	SKS	fair
KT09	57.348	-153.794	-10.8	124.2	14	257.5	94.8	SKS	fair
EP23	56.9071	-157.02	-31.8	-179.4	115	198.9	90.7	SKS	fair
ET17	58.6097	-156.265	-31.8	-179.4	115	199.5	92.4	SKS	fair
KD01	57.6401	-152.438	-31.8	-179.4	115	202.7	92.2	SKS	fair
KS03	57.6133	-152.235	-31.8	-179.4	115	202.8	92.2	SKS	fair
WD51	55.9051	-152.772	-31.8	-179.4	115	202.4	90.5	SKS	fair
KT07	57.5375	-153.981	-7.5	114.5	9	267.3	97.1	SKS	fair
LA34	54.0449	-158.588	-29.5	60.8	10	294.8	142.6	SKS	fair
EP16	59.1126	-156.857	-57.4	-66.4	10	128.5	136.5	PKS	fair
KD04	57.3042	-152.85	-8.1	-71.6	570	101.7	92.2	SKS	fair
KT09	57.348	-153.794	-8.1	-71.6	570	100.9	92.7	SKS	fair
LT07	56.6712	-156.12	-8.1	-71.6	570	99	93.8	SKS	fair
LT17	54.5677	-160.202	-8.1	-71.6	570	95.9	95.8	SKKS	fair
KT07	57.5375	-153.981	-10.4	119	24	261.9	97.2	SKS	fair
LA33	54.1528	-158.114	-10.4	119	24	258.1	94.3	SKS	fair
EP14	59.3257	-155.904	-14.7	-70.2	267	101.2	100.5	SKS	fair
KD01	57.6401	-152.438	-14.7	-70.2	267	104.4	98.3	SKS	fair
KS03	57.6133	-152.235	-14.7	-70.2	267	104.5	98.2	SKS	fair
LD44	53.8302	-159.774	-14.7	-70.2	267	99.1	101.6	SKS	fair
WD68	52.9176	-160.081	-14.7	-70.2	267	99	101.6	SKS	fair
KT07	57.5375	-153.981	-17.9	-65.9	359	101.4	104	SKS	fair
KT08	57.443	-153.815	-17.9	-65.9	359	101.6	103.9	SKS	fair
KT08	57.443	-153.815	10.9	57.2	10	328	107.1	SKS	fair
LD45	54.1025	-159.883	10.9	57.2	10	321.5	107.9	SKS	fair
KD04	57.3042	-152.85	0.4	97.7	19	286.7	100	SKS	fair
KS13	56.9472	-154.173	0.4	97.7	19	285.5	99.4	SKS	fair
WD67	52.1626	-160.036	0.4	97.7	19	280	97.2	SKS	fair
KD01	57.6401	-152.438	-30.6	-178.1	46	201.9	90.9	SKS	fair
KD02	57.8618	-152.657	-30.6	-178.1	46	201.7	91	SKS	fair
KS03	57.6133	-152.235	-30.6	-178.1	46	202	90.9	SKS	fair
WD48	56.6274	-151.731	-30.6	-178.1	46	202.5	90.1	SKS	fair
ET18	58.5458	-155.788	-31	-178.1	21	199	91.5	SKS	fair
KD01	57.6401	-152.438	-31	-178.1	21	201.8	91.2	SKS	fair
KD02	57.8618	-152.657	-30.5	-177.8	30	201.5	90.9	SKS	fair
LA39	56.8827	-151.001	-30.9	-177.5	14	202.5	90.6	SKS	fair
KD01	57.6401	-152.438	-18.2	120.4	10	257.7	103.8	SKS	fair
WD51	55.9051	-152.772	-18.2	120.4	10	257	103.3	SKS	fair
WD58	53.9062	-155.035	-18.2	120.4	10	254.8	101.5	SKS	fair
WP30	56.001	-161.201	-18.2	120.4	10	250.3	98.8	SKS	fair
KT07	57.5375	-153.981	-8.8	114.5	80	266.5	98.3	SKS	fair
WD49	54.3991	-151.899	-8.8	114.5	80	267.8	99.3	SKS	fair
KT07	57.5375	-153.981	-34.2	-72.3	25	116.2	114.2	SKKS	fair
KT08	57.443	-153.815	-49.7	-113.8	10	153.4	112.1	SKKS	fair
LD41	54.5219	-153.407	-7.3	104.8	49	275.4	102.8	SKS	fair
WD50	55.4495	-152.392	-7.3	104.8	49	276.5	103.2	SKS	fair
WD68	52.9176	-160.081	-7.3	104.8	49	269.7	98.9	SKS	fair
KD01	57.6401	-152.438	-2	98.6	9	285.1	101.8	SKS	good
KD04	57.3042	-152.85	-2	98.6	9	284.7	101.6	SKS	good
KD12	57.313	-154.612	-7.1	122.7	578	260	92	SKS	good
KT08	57.443	-153.815	-7.1	122.7	578	260.7	92.5	SKS	good
WD50	55.4495	-152.392	-8.2	116.5	14	266.2	97.4	SKS	good
KD01	57.6401	-152.438	-11	-70.8	630	103	94.9	SKS	good
KS03	57.6133	-152.235	-11	-70.8	630	103.1	94.8	SKS	good
KT09	57.348	-153.794	-11	-70.8	630	101.9	95.5	SKS	good
WD62	53.362	-157.332	-11	-70.8	630	99.4	96.8	SKS	good
KD02	57.8618	-152.657	-10.8	124.2	14	258.5	95.5	SKS	good
KS11	57.1277	-153.088	-31.8	-179.4	115	202.1	91.6	SKS	good
EP14	59.3257	-155.904	-57.4	-66.4	10	128.9	136.3	PKS	good
WD65	52.8991	-158.912	-19.6	-69.3	102	102.4	105.3	SKKS	good
KD02	57.8618	-152.657	-8.1	-71.6	570	101.9	92.2	SKS	good
KT08	57.443	-153.815	-8.1	-71.6	570	100.9	92.7	SKS	good
WD53	53.7794	-153.423	-8.1	-71.6	570	101.4	91.8	SKS	good
KT06	57.6517	-154.004	-10.3	119.2	26	261.8	97	SKS	good
KD04	57.3042	-152.85	-10.4	119	24	262.8	97.7	SKS	good
WP30	56.001	-161.201	-10.4	119	24	255.8	93	SKS	good
KD02	57.8618	-152.657	-14.7	-70.2	267	104.1	98.5	SKS	good
KD04	57.3042	-152.85	-14.7	-70.2	267	104.1	98.5	SKS	good
KD05	57.8717	-153.41	-14.7	-70.2	267	103.5	98.9	SKS	good
KS11	57.1277	-153.088	-14.7	-70.2	267	103.9	98.5	SKS	good
KS13	56.9472	-154.173	-14.7	-70.2	267	103	99.1	SKS	good
KT07	57.5375	-153.981	-14.7	-70.2	267	103.1	99.1	SKS	good
KT08	57.443	-153.815	-14.7	-70.2	267	103.3	99	SKS	good
KT09	57.348	-153.794	-14.7	-70.2	267	103.3	99	SKS	good
LA34	54.0449	-158.588	-14.7	-70.2	267	100	101	SKS	good
WD49	54.3991	-151.899	-14.7	-70.2	267	105.2	97.2	SKS	good
WD50	55.4495	-152.392	-14.7	-70.2	267	104.7	97.8	SKS	good
WD54	56.3314	-149.067	-14.7	-70.2	267	107.3	96.2	SKS	good
WD66	53.3145	-159.618	-14.7	-70.2	267	99.3	101.4	SKS	good
WP24	56.9241	-158.66	-14.7	-70.2	267	99.4	101.5	SKS	good
KT07	57.5375	-153.981	-30.1	-72.1	11	113.5	110.9	SKS	good
KT07	57.5375	-153.981	-31	-178.1	21	200.5	90.8	SKS	good
KT07	57.5375	-153.981	-18.2	120.4	10	256.4	103	SKS	good
KD02	57.8618	-152.657	-8.8	114.5	80	267.7	99	SKS	good
EP16	59.1126	-156.857	-34.2	-72.3	25	113.4	116.3	SKKS	good
WD53	53.7794	-153.423	-7.3	104.8	49	275.2	102.8	SKS	good
WD57	54.7364	-154.434	-7.3	104.8	49	274.6	102.2	SKS	good
WD62	53.362	-157.332	-7.3	104.8	49	272	100.5	SKS	good
WP30	56.001	-161.201	-7.3	104.8	49	269.2	98.3	SKS	good

## Sheet: G48860
Lynner, C., 2021, Anisotropy-revealed change in hydration along the Alaska subduction zone: Geology, v. 49, https://doi.org/10.1130/G48860.1
